# Supplementary material
Source: PubMed Central journal article supplement (PMC7819718)
Supplement: NIHMS1062890-supplement-Supplementary_Table_1.pdf [file NIHMS1062890-supplement-Supplementary_Table_1.pdf]

**Supplementary Table 1. List of strains used in manuscript.**

| <b>Figures</b>                 | <b>Strains</b>                                                                                                                                                                                                                                                                                                                                                                                                                                                                                                             |
|--------------------------------|----------------------------------------------------------------------------------------------------------------------------------------------------------------------------------------------------------------------------------------------------------------------------------------------------------------------------------------------------------------------------------------------------------------------------------------------------------------------------------------------------------------------------|
| 1 - 3, 4e-f, Extended Data 1-5 | D. melanogaster strains CM07, CarM03, N30, NM91, TZ58, ZH23, ZW109 (provided by Peter Andolfatto or the Drosophila species stock center), and Canton S (lab stock). Males courting PIBL (GMR-hid/GMR-hid; orco-/orco- [32, 44])*                                                                                                                                                                                                                                                                                           |
| 4c-d, Extended Data 7          | UAS-CsChrimson [40] was obtained from the Bloomington stock center (UAS-CsChrimson [40] was contributed to the stock center by Vivek Jayaraman). P1a: UASCsChrimson/+; GMR15A01-AD (attp40)/+; GMR71G01-DBD (attp2)/+ (GMR15A01-AD (attp40); GMR71G01-DBD (attp2) [34] kindly provided by David Anderson. vPR6: w/+; UAS>stop>CsChrimson/+; VT57239, FruFLP/+ (VT57239 and FruFLP [70,73] were kindly provided by Barry Dickson and UAS>stop>CsChrimson [40] was kindly provided by Vivek Jayaraman). Males courting PIBL. |
| 4c-d,f-i, Extended Data 7-10   | pIP10: w/+; UAS>stop>CsChrimson/+; VT40556, FruFLP/+ (VT40556 and FruFLP [70, 73] were kindly provided by Barry Dickson and UAS>stop>CsChrimson [40] was kindly provided by Vivek Jayaraman. Males courting PIBL.                                                                                                                                                                                                                                                                                                          |
